# Supplementary material for: Bacillus velezensis YXDHD1-7 Prevents Early Blight Disease by Promoting Growth and Enhancing Defense Enzyme Activities in Tomato Plants
Source: MDPI journal article supplement (doi:10.3390/microorganisms12050921), 2024-04-30
Supplement: s1 [file s1]

Table S1. Antagonistic effect of isolated strains on *A. asolani*

| Strain No. | Sampling location | Inhibition rate (%) | 16S r DNA Identification    | Similarity (%) |
|------------|-------------------|---------------------|-----------------------------|----------------|
| YXDHD1-7   | Yangjiang         | 80.00±0.16          | <i>Bacillus velezensis</i>  | 99.86          |
| YXPT1-4-1  | Yangjiang         | 76.22±0.99          | <i>Bacillus siamensis</i>   | 99.86          |
| YXDHD1-4-2 | Yangjiang         | 75.79±0.83          | <i>Bacillus velezensis</i>  | 99.99          |
| YXDHD1-6-2 | Yangjiang         | 74.54±0.01          | <i>Bacillus siamensis</i>   | 99.60          |
| DBBHT1-8-1 | Maoming           | 74.13±0.69          | <i>Bacillus siamensis</i>   | 99.60          |
| YXDHD1-3-1 | Yangjiang         | 73.37±0.17          | <i>Bacillus siamensis</i>   | 99.90          |
| DBBHT2-2   | Maoming           | 72.55±0.09          | <i>Bacillus siamensis</i>   | 99.60          |
| DBBHT2-3-1 | Maoming           | 72.54±0.08          | <i>Bacillus siamensis</i>   | 99.86          |
| YXDHD1-6-1 | Yangjiang         | 70.85±0.94          | <i>Bacillus siamensis</i>   | 99.60          |
| YXDHD1-5   | Yangjiang         | 70.41±0.76          | <i>Bacillus siamensis</i>   | 99.64          |
| YXDHD1-7-1 | Yangjiang         | 70.06±0.33          | <i>Bacillus siamensis</i>   | 99.64          |
| YXXT2-2-2  | Yangjiang         | 69.55±0.97          | <i>Bacillus siamensis</i>   | 99.99          |
| DBSDH3     | Maoming           | 69.03±0.42          | <i>Bacillus siamensis</i>   | 99.90          |
| DBDY-1-5-3 | Maoming           | 68.75±0.32          | <i>Bacillus siamensis</i>   | 99.60          |
| DBSDH5     | Maoming           | 68.02±0.47          | <i>Bacillus siamensis</i>   | 99.60          |
| DBSD2-7-1  | Maoming           | 65.61±0.51          | <i>Bacillus tequilensis</i> | 99.93          |
| DBBHT1-3-1 | Maoming           | 64.81±0.74          | <i>Bacillus velezensis</i>  | 99.93          |
| DBSDH6-1   | Maoming           | 63.07±0.99          | <i>Bacillus velezensis</i>  | 99.93          |
|            |                   |                     | <i>Paenibacillus</i>        |                |
| DBBHT1-6   | Maoming           | 62.77±7.41          | <i>glycanilyticus</i>       | 99.60          |
|            | Maoming           |                     | <i>Streptomyces</i>         |                |
| DBGE1-11   |                   | 62.6±2.38           | <i>acidiscabies</i>         | 99.60          |
| YXDHD1-4-6 | Yangjiang         | 62.57±0.47          | <i>Bacillus siamensis</i>   | 99.93          |
| DBSD2-6    | Maoming           | 62.38±0.16          | <i>Bacillus tequilensis</i> | 99.90          |
| DBGE1-3    | Maoming           | 61.18±1.44          | <i>Bacillus velezensis</i>  | 99.85          |
| YXPT1-1-1  | Yangjiang         | 60.17±0.99          | <i>Bacillus tequilensis</i> | 99.93          |
| DBSD2-6-1  | Maoming           | 59.96±0.28          | <i>Bacillus tequilensis</i> | 99.93          |
| DBGE1-3-1  | Maoming           | 59.47±0.33          | <i>Bacillus velezensis</i>  | 99.93          |
|            |                   |                     | <i>Paenibacillus</i>        |                |
| DBHHT1-6-1 | Maoming           | 56.32±5.51          | <i>glycanilyticus</i>       | 99.30          |
| DBBHT1-2   | Maoming           | 55.97±1.38          | <i>Bacillus siamensis</i>   | 100            |
| DBBHT1-5   | Maoming           | 55.04±0.24          | <i>Bacillus siamensis</i>   | 99.51          |

|            |           |            |                                 |       |
|------------|-----------|------------|---------------------------------|-------|
| DBKZ2-1-1  | Maoming   | 53.51±0.43 | <i>Paenibacillus cineris</i>    | 99.38 |
| YXXT1-3    | Yangjiang | 53.27±0.72 | <i>Bacillus altitudinis</i>     | 99.79 |
| YXDHD1-7-2 | Yangjiang | 52.58±1.68 | <i>Bacillus altitudinis</i>     | 99.79 |
| DBSDH6     | Maoming   | 52.1±0.63  | <i>Bacillus velezensis</i>      | 100   |
| YXXT1-8    | Yangjiang | 51.19±0.04 | <i>Paenibacillus cineris</i>    | 99.24 |
| DBKZ1-3-1  | Maoming   | 51.13±1.7  | <i>Mesobacillus thioparans</i>  | 99.79 |
| DBBHT2-3   | Maoming   | 51.06±1.53 | <i>Metabacillus idriensis</i>   | 100   |
| DBDY1-7-5  | Maoming   | 50.21±0.01 | <i>Bacillus altitudinis</i>     | 99.79 |
|            |           |            | <i>Streptomyces</i>             |       |
| YXDHD1-1   | Yangjiang | 48.94±1.28 | <i>griseorubiginosus</i>        | 99.90 |
| YXDHD1-3-2 | Yangjiang | 48.83±0.41 | <i>Bacillus rhizoplanarum</i>   | 99.56 |
| DBKZ1-5    | Maoming   | 48.53±0.39 | <i>Bacillus altitudinis</i>     | 100   |
| DBKZ1-3-2  | Maoming   | 48.29±0.26 | <i>Bacillus rhizoplanarum</i>   | 99.50 |
| DBBHT1-8-3 | Maoming   | 47.39±1.71 | <i>Bacillus altitudinis</i>     | 99.79 |
| YXXT1-8-2  | Maoming   | 47.39±1.21 | <i>Bacillus siamensis</i>       | 99.86 |
|            |           |            | <i>Kitasatospora</i>            |       |
| DBDY1-4    | Maoming   | 45.94±0.42 | <i>aureofaciens</i>             | 98.85 |
| DBSD2-1-4  | Maoming   | 45.51±1.31 | <i>Bacillus subtilis</i>        | 99.71 |
| DBSDH3-1   | Maoming   | 45.25±0.25 | <i>Mesobacillus thioparans</i>  | 99.43 |
|            |           |            | <i>Staphylococcus</i>           |       |
| DBKZ1-4-1  | Maoming   | 45.1±0.88  | <i>haemolyticus</i>             | 99.79 |
| DBKZ2-2    | Maoming   | 43.61±0.54 | <i>Streptomyces fodineus</i>    | 99.36 |
| DBDY1-4    | Maoming   | 43.44±0.27 | <i>Priestia megaterium</i>      | 99.44 |
|            |           |            | <i>Staphylococcus</i>           |       |
| DBKZ1-3    | Maoming   | 42.42±0.15 | <i>haemolyticus</i>             | 100   |
| DBGE1-2-1  | Maoming   | 38.42±0.5  | <i>Bacillus altitudinis</i>     | 100   |
|            |           |            | <i>Streptomyces</i>             |       |
| DBSD1-11   | Maoming   | 55.17±0.67 | <i>albogriseolus</i>            | 100   |
| DBBHT1-7   | Maoming   | 47.31±0.95 | <i>Streptomyces seoulensis</i>  | 99.49 |
| DBDY1-3    | Maoming   | 36.26±0.36 | <i>Streptomyces griseoruber</i> | 100   |

Notice: Inhibition rate values are presented as mean ± SD of three replications. In fact, *Bacillus* strains can only be identified to the genus level using 16S rRNA.

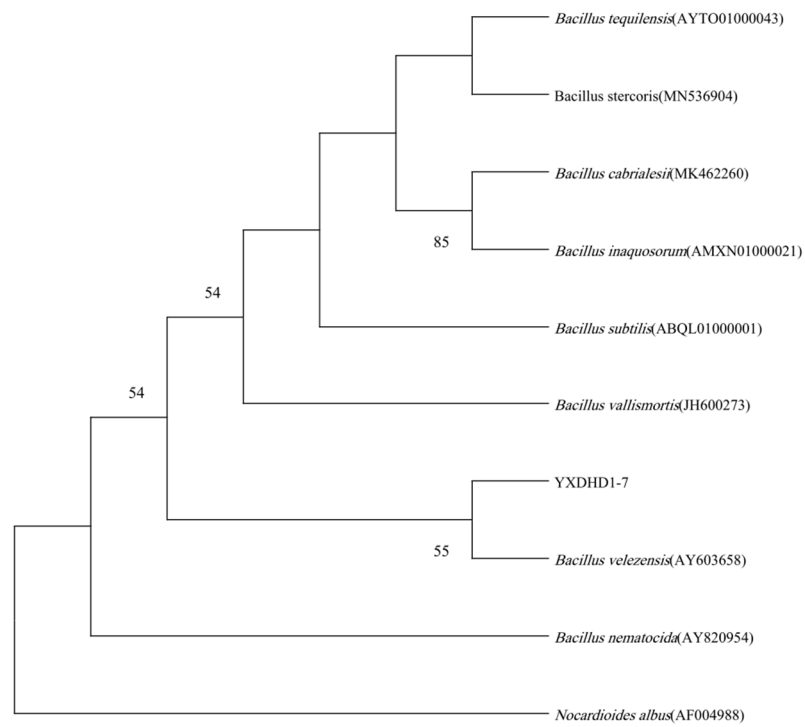

Figure S1. Phylogenetic tree illustrating the relationships between YXDHD1-7 and the examined bacterial strains in EzBioCloud in terms of the evolutionary distances of 16S rRNA gene sequences using the neighbor-joining method.
